# Supplementary material for: Defects in meiosis I contribute to the genesis of androgenetic hydatidiform moles
Source: PubMed Central journal article supplement (PMC11563684; doi:10.1172/jci170669), 2024-11-15
Supplement: jci-134-170669-s066.pdf [file jci-134-170669-s066.pdf]

## Patient 1690

Total number of variants with MAF  $\leq$  1%

2696 variants

Potentially recessive variants:  
(homozygous & multiple heterozygous)

319 variants

Variants in  $\leq$ 5 in-house controls

221 variants

Frameshift/splicing/stop-gain/ nonsynonymous

92 variants

Homozygous/multiple heterozygous with CADD score  $\geq$ 10, remove low ranked genes

24 genes

Role in reproduction

**FOXL2**

Two other genes were in the same run of homozygosity as FOXL2, but both were not involved in reproduction

| Position        | Zygoty       | Variant  | Gene      | CADD  | Classification         | Full gene name                                       |
|-----------------|--------------|----------|-----------|-------|------------------------|------------------------------------------------------|
| chr1:17944985   | multiple het | p.P46L   | ARHGEF10L | 18.37 | Likely benign          | Rho guanine nucleotide exchange factor (GEF) 10-like |
| chr1:18023372   | multiple het | p.C816R  | ARHGEF10L | 13.7  | Likely benign          | Rho guanine nucleotide exchange factor (GEF) 10-like |
| chr1:201837847  | hom          | p.M643V  | IPO9      | 23.4  | Likely benign          | importin 9                                           |
| chr2:74763556   | hom          | p.R174W  | LOXL3     | 29.4  | Uncertain significance | lysyl oxidase-like 3                                 |
| chr2:108471084  | multiple het | p.R351X  | RGPD4     | 37    | Uncertain significance | RANBP2-like and GRIP domain containing 4             |
| chr2:108476179  | multiple het | p.P546S  | RGPD4     | 13.01 | Uncertain significance | RANBP2-like and GRIP domain containing 4             |
| chr3:111940029  | hom          | p.S491N  | SLC9C1    | 14.16 | Uncertain significance | Solute Carrier Family 9 Member C1                    |
| chr3:138665065  | hom          | p.F167S  | FOXL2     | 24.5  | Uncertain significance | forkhead box L2                                      |
| chr3:141905352  | hom          | p.S208F  | GKS       | 29.3  | Uncertain significance | glycerol kinase 5 (putative)                         |
| chr9:34723858   | multiple het | p.R1127X | FAM205A   | 35    | Uncertain significance | Family With Sequence Similarity 205 Member A         |
| chr9:34725914   | multiple het | p.S441R  | FAM205A   | 24.4  | Uncertain significance | Family With Sequence Similarity 205 Member A         |
| chr12:25260968  | hom          | p.R492X  | LRMP      | 38    | Uncertain significance | lymphoid-restricted membrane protein                 |
| chr12:49722810  | multiple het | p.R331H  | TROAP     | 32    | Uncertain significance | trophinin associated protein (tastin)                |
| chr12:49723656  | multiple het | p.R394Q  | TROAP     | 10.11 | Likely benign          | trophinin associated protein (tastin)                |
| chr12:116452965 | hom          | p.H375R  | MED13L    | 15.75 | Uncertain significance | mediator complex subunit 13-like                     |
| chr14:61747193  | multiple het | p.P225S  | TMEM30B   | 19.37 | Uncertain significance | transmembrane protein 30B                            |
| chr14:61747575  | multiple het | p.Y97X   | TMEM30B   | 37    | Uncertain significance | transmembrane protein 30B                            |
| chr16:88721816  | multiple het | p.E230X  | MVD       | 36    | Uncertain significance | mevalonate (diphospho) decarboxylase                 |
| chr16:88722069  | multiple het | p.L225V  | MVD       | 12.64 | Uncertain significance | mevalonate (diphospho) decarboxylase                 |
| chr17:26864371  | hom          | p.E622K  | FOXN1     | 26.5  | Uncertain significance | forkhead box N1                                      |
| chr17:27047875  | hom          | p.K59R   | RPL23A    | 22.6  | Uncertain significance | ribosomal protein L23a                               |
| chr17:27908976  | hom          | p.V198I  | GIT1      | 12.85 | Benign                 | G protein-coupled receptor kinase interactor 1       |
| chr17:34199457  | hom          | p.R67Q   | CCL5      | 34    | Uncertain significance | chemokine (C-C motif) ligand 5                       |
| chr17:37331496  | hom          | p.R583C  | CACNB1    | 34    | Uncertain significance | calcium handling in skeletal muscle                  |
| chr17:39502471  | hom          | p.C372Y  | KRT33A    | 25.4  | Uncertain significance | keratin 33A                                          |
| chr17:42476045  | hom          | p.K1056Q | GPATCH8   | 15.98 | Uncertain significance | G patch domain containing 8                          |
| chr17:42979917  | hom          | p.H154P  | CCDC103   | 15.16 | Uncertain significance | coiled-coil domain containing 103                    |
| chr19:44039535  | multiple het | p.R145P  | ZNF575    | 32    | Uncertain significance | zinc finger protein 575                              |
| chr19:44039540  | multiple het | p.Y147H  | ZNF575    | 23.6  | Uncertain significance | zinc finger protein 575                              |
| chr19:56701308  | multiple het | p.R459L  | ZSCAN5B   | 23.2  | Uncertain significance | Zinc Finger And SCAN Domain-Containing Protein 5B    |
| chr19:56701355  | multiple het | p.Y443X  | ZSCAN5B   | 28.7  | Uncertain significance | Zinc Finger And SCAN Domain-Containing Protein 5B    |
| chr19:56701387  | multiple het | p.H433Y  | ZSCAN5B   | 24.4  | Uncertain significance | Zinc Finger And SCAN Domain-Containing Protein 5B    |
| chr20:44533615  | hom          | p.A188V  | PLTP      | 34    | Uncertain significance | phospholipid transfer protein                        |

**Supplemental Figure 1. Exome filtering for potentially recessive variants in patient 1690 (1st WES). Genes in the homozygous interval on chromosome 3 are indicated by a bracket.**

## Patient 1690 end WES

Total number of variants with MAF  $\leq 1\%$

2696 variants

Potentially recessive variants:  
(homozygous & multiple heterozygous)

319 variants

Variants in  $\leq 5$  in-house controls

221 variants

Frameshift/splicing/stop-gain/ nonsynonymous

92 variants

Homozygous/multiple heterozygous with CADD score  $\geq 10$ , remove low ranked genes

24 genes

Role in reproduction

**FOXL2**

Two other genes were in the same run of homozygosity as FOXL2, but both were not involved in reproduction

| Position        | Zygoty       | Variant  | Gene      | CADD  | Classification         | Full gene name                                       |
|-----------------|--------------|----------|-----------|-------|------------------------|------------------------------------------------------|
| chr1:17944985   | multiple het | p.P46L   | ARHGEF10L | 18.37 | Likely benign          | Rho guanine nucleotide exchange factor (GEF) 10-like |
| chr1:18023372   | multiple het | p.C816R  | ARHGEF10L | 13.7  | Likely benign          | Rho guanine nucleotide exchange factor (GEF) 10-like |
| chr1:201837847  | hom          | p.M643V  | IPO9      | 23.4  | Likely benign          | importin 9                                           |
| chr2:74763556   | hom          | p.R174W  | LOXL3     | 29.4  | Uncertain significance | lysyl oxidase-like 3                                 |
| chr2:108471084  | multiple het | p.R351X  | RGPD4     | 37    | Uncertain significance | RANBP2-like and GRIP domain containing 4             |
| chr2:108476179  | multiple het | p.P546S  | RGPD4     | 13.01 | Uncertain significance | RANBP2-like and GRIP domain containing 4             |
| chr3:111940029  | hom          | p.S491N  | SLC9C1    | 14.16 | Uncertain significance | Solute Carrier Family 9 Member C1                    |
| chr3:138665065  | hom          | p.F167S  | FOXL2     | 24.5  | Uncertain significance | forkhead box L2                                      |
| chr3:141905352  | hom          | p.S208F  | GKS       | 29.3  | Uncertain significance | glycerol kinase 5 (putative)                         |
| chr9:34723858   | multiple het | p.R1127X | FAM205A   | 35    | Uncertain significance | Family With Sequence Similarity 205 Member A         |
| chr9:34725914   | multiple het | p.S441R  | FAM205A   | 24.4  | Uncertain significance | Family With Sequence Similarity 205 Member A         |
| chr12:25260968  | hom          | p.R492X  | LRMP      | 38    | Uncertain significance | lymphoid-restricted membrane protein                 |
| chr12:49722810  | multiple het | p.R331H  | TROAP     | 32    | Uncertain significance | trophinin associated protein (tastin)                |
| chr12:49723656  | multiple het | p.R394Q  | TROAP     | 10.11 | Likely benign          | trophinin associated protein (tastin)                |
| chr12:116452965 | hom          | p.H375R  | MED13L    | 15.75 | Uncertain significance | mediator complex subunit 13-like                     |
| chr14:61747193  | multiple het | p.P225S  | TMEM30B   | 19.37 | Uncertain significance | transmembrane protein 30B                            |
| chr14:61747575  | multiple het | p.Y97X   | TMEM30B   | 37    | Uncertain significance | transmembrane protein 30B                            |
| chr16:88721816  | multiple het | p.E230X  | MVD       | 36    | Uncertain significance | mevalonate (diphospho) decarboxylase                 |
| chr16:88722069  | multiple het | p.L225V  | MVD       | 12.64 | Uncertain significance | mevalonate (diphospho) decarboxylase                 |
| chr17:26864371  | hom          | p.E622K  | FOXN1     | 26.5  | Uncertain significance | forkhead box N1                                      |
| chr17:27047875  | hom          | p.K59R   | RPL23A    | 22.6  | Uncertain significance | ribosomal protein L23a                               |
| chr17:27908976  | hom          | p.V198I  | GIT1      | 12.85 | Benign                 | G protein-coupled receptor kinase interactor 1       |
| chr17:34199457  | hom          | p.R67Q   | CCL5      | 34    | Uncertain significance | chemokine (C-C motif) ligand 5                       |
| chr17:37331496  | hom          | p.R583C  | CACNB1    | 34    | Uncertain significance | calcium handling in skeletal muscle                  |
| chr17:39502471  | hom          | p.C372Y  | KRT33A    | 25.4  | Uncertain significance | keratin 33A                                          |
| chr17:42476045  | hom          | p.K1056Q | GPATCH8   | 15.98 | Uncertain significance | G patch domain containing 8                          |
| chr17:42979917  | hom          | p.H154P  | CCDC103   | 15.16 | Uncertain significance | coiled-coil domain containing 103                    |
| chr19:44039535  | multiple het | p.R145P  | ZNF575    | 32    | Uncertain significance | zinc finger protein 575                              |
| chr19:44039540  | multiple het | p.Y147H  | ZNF575    | 23.6  | Uncertain significance | zinc finger protein 575                              |
| chr19:56701308  | multiple het | p.R459L  | ZSCAN5B   | 23.2  | Uncertain significance | Zinc Finger And SCAN Domain-Containing Protein 5B    |
| chr19:56701355  | multiple het | p.Y443X  | ZSCAN5B   | 28.7  | Uncertain significance | Zinc Finger And SCAN Domain-Containing Protein 5B    |
| chr19:56701387  | multiple het | p.H433Y  | ZSCAN5B   | 24.4  | Uncertain significance | Zinc Finger And SCAN Domain-Containing Protein 5B    |
| chr20:44533615  | hom          | p.A188V  | PLTP      | 34    | Uncertain significance | phospholipid transfer protein                        |

**Supplemental Figure 2. Exome filtering for potentially recessive variants in patient 1690 (2nd WES). Genes in the homozygous interval on chromosome 3 are indicated by a bracket.**

## Patient 1824

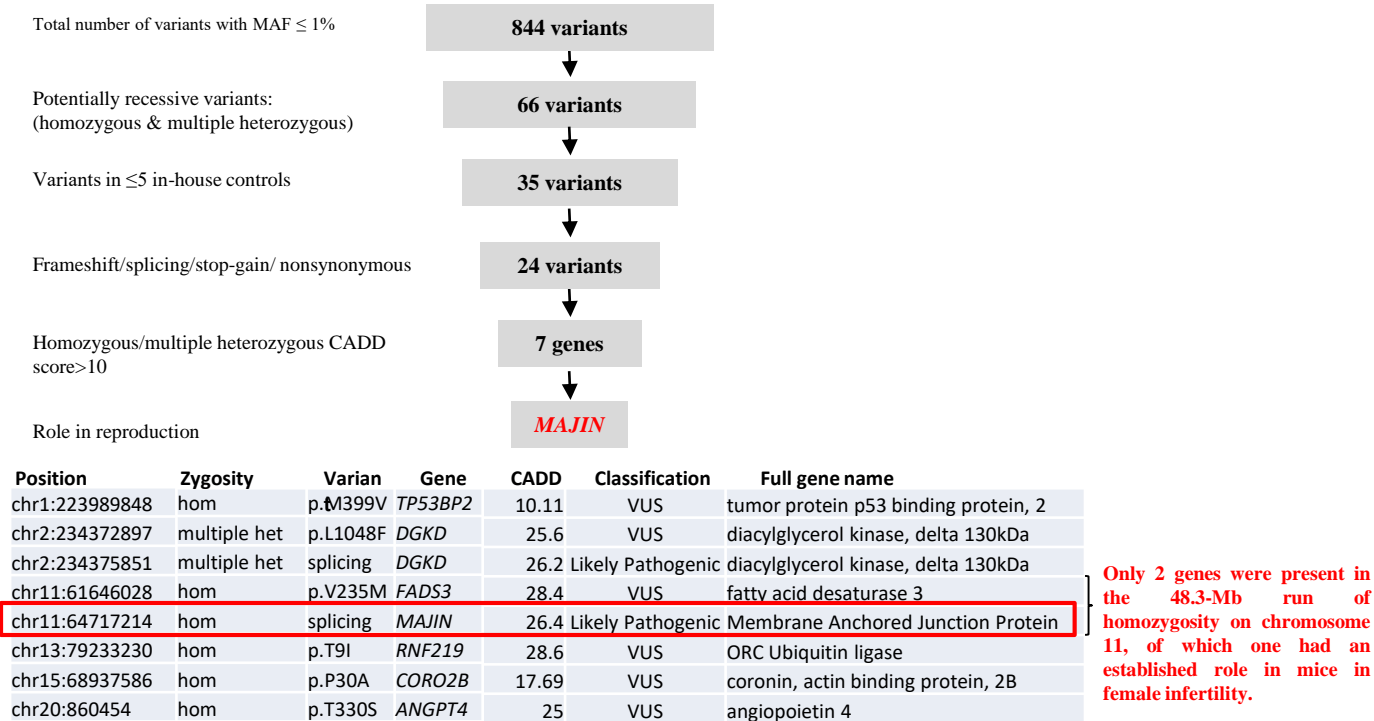

**Supplemental Figure 3. Exome filtering for potentially recessive variants in patient 1824.** Genes in the homozygous interval on chromosome 11 are indicated by a bracket.

## Patient 439

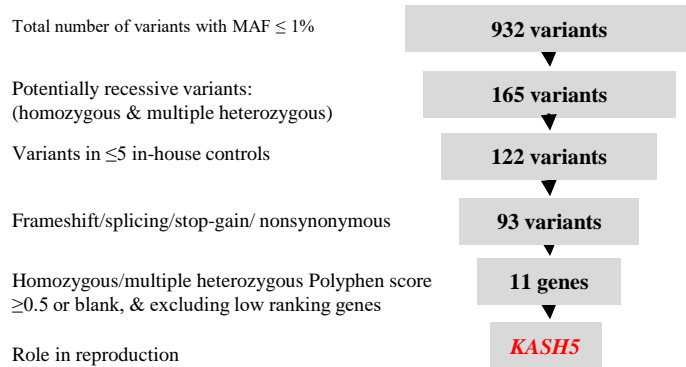

| Position       | Homozygosity | Protein Change  | Gene     | Polyphen2 score | Gene Description                                                 |
|----------------|--------------|-----------------|----------|-----------------|------------------------------------------------------------------|
| chr2:108460090 | hom          | p.R229Q         | RGPD4    | Blank           | RANBP2-like and GRIP domain containing 4                         |
| chr2:178494176 | possibly hom | p.S476delinsSP  | PDE11A   | Blank           | phosphodiesterase 11A                                            |
| chr2:233712227 | hom          | p.P1211delinsQP | GIGYF2   | Blank           | trinucleotide repeat containing 15                               |
| chr3:118865140 | multiple het | p.Q35R          | C3orf30  | 0.929           | chromosome 3 open reading frame 30                               |
| chr3:118865615 | multiple het | p.Q193H         | C3orf30  | 0.683           | chromosome 3 open reading frame 30                               |
| chr6:7373628   | multiple het | p.R339Q         | CAGE1    | Blank           | cancer antigen 1                                                 |
| chr6:7374210   | multiple het | p.R145Q         | CAGE1    | Blank           | cancer antigen 1                                                 |
| chr7:72733018  | multiple het | p.R177C         | TRIM50   | 0.994           | tripartite motif-containing 50// tripartite motif-containing 50A |
| chr7:72738583  | multiple het | p.N68I          | TRIM50   | 0.999           | tripartite motif-containing 50// tripartite motif-containing 50A |
| chr8:125989023 | multiple het | p.N171K         | ZNF572   | 0.951           | zinc finger protein 572                                          |
| chr8:125989758 | multiple het | p.E416D         | ZNF572   | 0.62            | zinc finger protein 572                                          |
| chr15:22742660 | possibly hom | p.E349K         | GOLGA6L1 | Blank           |                                                                  |
| chr15:22742661 | possibly hom | p.E349G         | GOLGA6L1 | Blank           |                                                                  |
| chr16:11220018 | multiple het | p.R868C         | CLEC16A  | Blank           | C-type lectin domain family 16, member A                         |
| chr16:11272435 | multiple het | p.S1017N        | CLEC16A  | Blank           | C-type lectin domain family 16, member A                         |
| chr19:49920633 | multiple het | p.R519X         | CCDC155  | Blank           | KASH Domain-Containing Protein 5                                 |
| chr19:49920682 | multiple het | p.L535Q         | CCDC155  | Blank           | KASH Domain-Containing Protein 5                                 |

13 variants in other genes were also selected under less stringent criteria, validated, segregated, and the results allowed their exclusions (either not confirmed in the patient or not segregating with the phenotype).

**Supplemental Figure 4. Exome filtering for potentially recessive variants in patient 439.**

## Patient 1954

Total number of variants with MAF  $\leq$  1%

1643 variants

Potentially recessive variants:  
(homozygous & multiple heterozygous)

239 variants

Variants in  $\leq$ 5 in-house controls

134 variants

Frameshift/splicing/stop-gain/ nonsynonymous

83 variants

Homozygous/multiple heterozygous CADD  
score > 10

10 genes

Role in reproduction

**SYCP2**

| Position       | Zygoty       | Variant  | Gene           | CADD  | Classification | Full gene name                                            |
|----------------|--------------|----------|----------------|-------|----------------|-----------------------------------------------------------|
| chr1:1564775   | possibly hom | p.A848T  | <i>MIB2</i>    | 10.91 | VUS            | mindbomb homolog 2 (Drosophila)                           |
| chr1:109444428 | multiple het | p.A272S  | <i>GPSM2</i>   | 25.5  | VUS            | G-protein signaling modulator 2 (AGS3-like, C. elegans)   |
| chr1:109472390 | multiple het | p.D628V  | <i>GPSM2</i>   | 29.4  | VUS            | G-protein signaling modulator 2 (AGS3-like, C. elegans)   |
| chr2:64323264  | hom          | p.K229E  | <i>PELI1</i>   | 16.56 | VUS            | pellino homolog 1 (Drosophila)                            |
| chr6:133846250 | hom          | p.N558K  | <i>EYA4</i>    | 17.78 | VUS            | eyes absent homolog 4 (Drosophila)                        |
| chr9:90321137  | hom          | p.V1051M | <i>DAPK1</i>   | 23.4  | VUS            | death-associated protein kinase 1                         |
| chr14:70418999 | multiple het | p.V82M   | <i>SMOC1</i>   | 23.2  | VUS            | SPARC related modular calcium binding 1                   |
| chr14:70478230 | multiple het | p.A296T  | <i>SMOC1</i>   | 23.6  | VUS            | SPARC related modular calcium binding 1                   |
| chr15:34825151 | hom          | p.S61A   | <i>GOLGA8B</i> | 15.04 | VUS            | golgi autoantigen, golgin subfamily a, 8B                 |
| chr16:21848618 | possibly hom | p.D364Y  | <i>NPIP4</i>   | 13.98 | VUS            | Nuclear Pore Complex-Interacting Protein Family Member B4 |
| chr19:53269933 | multiple het | p.K359R  | <i>ZNF600</i>  | 17.48 | LB             | zinc finger protein 600                                   |
| chr19:53270257 | multiple het | p.C251Y  | <i>ZNF600</i>  | 24    | VUS            | zinc finger protein 600                                   |
| chr20:58457222 | hom          | splicing | <i>SYCP2</i>   | 22.5  | Pathogenic     | synaptonemal complex protein 2                            |

Only one gene in the 19.7-Mb run of homozygosity on chromosome 20

**Supplemental Figure 5. Exome filtering for potentially recessive variants in patient 1954.**

## Patient 1802

Total number of variants with MAF  $\leq$  1%

1059 variants

Potentially recessive variants:  
(homozygous & multiple heterozygous)

74 variants

Variants in  $\leq$ 5 in-house controls

47 variants

Frameshift/splicing/stop-gain/ nonsynonymous

33 variants

Homozygous/multiple heterozygous with CADD score  $\geq$ 10

11 genes

Role in reproduction

*HFM1*

| Position       | Zygosity     | Variant    | Gene    | CADD | Classification    | Full gene name                                                           |
|----------------|--------------|------------|---------|------|-------------------|--------------------------------------------------------------------------|
| chr1:89473514  | hom          | p.E427Q    | GBP3    | 20.7 | VUS               | guanylate binding protein 3// spastic paraplegia 3A (autosomal dominant) |
| chr1:89630543  | hom          | splicing   | GBP7    | 15.8 | Benign            | guanylate binding protein 7                                              |
| chr1:91781387  | hom          | p.Y1042fs  | HFM1    | 0    | Pathogenic        | HFM1, ATP-dependent DNA helicase homolog (S. cerevisiae)                 |
| chr1:93677666  | hom          | p.L448P    | CCDC18  | 28   | VUS               | coiled-coil domain containing 18                                         |
| chr1:110299757 | hom          | p.A301T    | EPS8L3  | 16.7 | VUS               | EPS8-like 3                                                              |
| chr2:159481864 | multiple het | p.D360Y    | PKP4    | 25.9 | VUS               | plakophilin 4                                                            |
| chr2:159481865 | multiple het | p.D360G    | PKP4    | 19.9 | VUS               | plakophilin 4                                                            |
| chr3:182735094 | hom          | p.A553V    | MCCC1   | 23.5 | VUS               | methylcrotonoyl-Coenzyme A carboxylase 1 (alpha)                         |
| chr5:176813232 | hom          | p.91_97del | SLC34A1 | 0    | Likely benign     | solute carrier family 34 (sodium phosphate), member 1                    |
| chr11:47312310 | hom          | p.G1039R   | MADD    | 23.8 | VUS               | electron-transfer-flavoprotein, alpha polypeptide (glutaric aciduria II) |
| chr14:39560724 | multiple het | p.Y187C    | SEC23A  | 25.1 | Likely pathogenic | Sec23 homolog A (S. cerevisiae)                                          |
| chr14:39565257 | multiple het | p.N22K     | SEC23A  | 24.8 | VUS               | Sec23 homolog A (S. cerevisiae)                                          |
| chr15:40398284 | multiple het | p.E2Q      | BMF     | 24.8 | VUS               | Bcl2 modifying factor                                                    |
| chr15:40398285 | multiple het | p.M1I      | BMF     | 27.3 | VUS               | Bcl2 modifying factor                                                    |

Only one pathogenic variant in one gene was present in the 25-Mb homozygous region on chromosome 1.

**Supplemental Figure 6. Exome filtering for potentially recessive variants in patient 1802.** Genes in the homozygous interval on chromosome 1 are indicated by a bracket.

## Patient 1922

Total number of variants with MAF  $\leq$  1%

921 variants

Potentially recessive variants:  
(homozygous & multiple heterozygous)

63 variants

Variants in  $\leq$  5 in-house controls

50 variants

Frameshift/splicing/stop-gain/ nonsynonymous

40 variants

Homozygous/multiple heterozygous with CADD score  $\geq$  10

23 genes

Role in reproduction

*HFMI*

| Position       | Zygoty       | Variant      | Gene     | CADD  | Classification | Full gene name                                                          |
|----------------|--------------|--------------|----------|-------|----------------|-------------------------------------------------------------------------|
| chr1:16069085  | multiple het | p.L11I       | TMEM82   | 20.8  | VUS            | transmembrane protein 82                                                |
| chr1:16069570  | multiple het | p.F73K       | TMEM82   | 23.7  | VUS            | transmembrane protein 82                                                |
| chr1:91781387  | multiple het | p.Y1042fs    | HFM1     | 33    | LP             | HFM1, ATP-dependent DNA helicase homolog ( <i>S. cerevisiae</i> )       |
| chr1:91844038  | multiple het |              | HFM1     | 25.7  | LP             | HFM1, ATP-dependent DNA helicase homolog ( <i>S. cerevisiae</i> )       |
| chr2:179438501 | multiple het | p.L15055F    | TTN      | 17.65 | VUS            | titin                                                                   |
| chr2:179654748 | multiple het | p.G586D      | TTN      | 18.85 | LB             | titin                                                                   |
| chr4:74352728  | multiple het | p.P176L      | AFM      | 29.8  | VUS            | afamin                                                                  |
| chr4:74353539  | multiple het |              | AFM      | 22.8  | VUS            | afamin                                                                  |
| chr4:90816531  | multiple het | p.S137P      | MMRN1    | 22.9  | VUS            | multimerin 1                                                            |
| chr4:90856311  | multiple het | p.Q494X      | MMRN1    | 35    | VUS            | multimerin 1                                                            |
| chr6:37614063  | multiple het | p.R712H      | MDGA1    | 23.5  | LB             | MAM domain containing glycosylphosphatidylinositol anchor 1             |
| chr6:37623667  | multiple het | p.D130H      | MDGA1    | 25.4  | VUS            | MAM domain containing glycosylphosphatidylinositol anchor 1             |
| chr6:85446768  | multiple het | p.M487V      | TBX18    | 21    | VUS            | T-box 18                                                                |
| chr10:11527059 | multiple het | p.T296I      | USP6NL   | 21    | VUS            | USP6 N-terminal like                                                    |
| chr10:17110649 | multiple het | p.915_915del | CUBN     | 18.88 | VUS            | cubilin (intrinsic factor-cobalamin receptor)                           |
| chr16:21065816 | multiple het | p.V1276I     | DNAH3    | 26.4  | VUS            | dynein, axonemal, heavy chain 3// dynein, axonemal, heavy polypeptide 3 |
| chr16:21123104 | multiple het | p.R588W      | DNAH3    | 31    | VUS            | dynein, axonemal, heavy chain 3// dynein, axonemal, heavy polypeptide 3 |
| chr17:39777046 | hom          | p.V349E      | KRT17    | 28.2  | VUS            | keratin 17                                                              |
| chr17:42397440 | hom          | p.M314V      | SLC25A39 | 26.1  | VUS            | solute carrier family 25, member 39                                     |
| chr17:72932029 | multiple het | p.A5T        | OTOP3    | 11.51 | VUS            | otopetrin 3                                                             |
| chr17:72932030 | multiple het | p.A5V        | OTOP3    | 13.26 | VUS            | otopetrin 3                                                             |
| chr21:43522324 | hom          | p.T412M      | UMODL1   | 25    | VUS            | uromodulin-like 1                                                       |
| chr21:44179139 | hom          | p.D64N       | PDE9A    | 26.3  | VUS            | phosphodiesterase 9A                                                    |

**Supplemental Figure 7. Exome filtering for potentially recessive variants in patient 1922, the maternal aunt of patient 1802.**

## Patient 2136

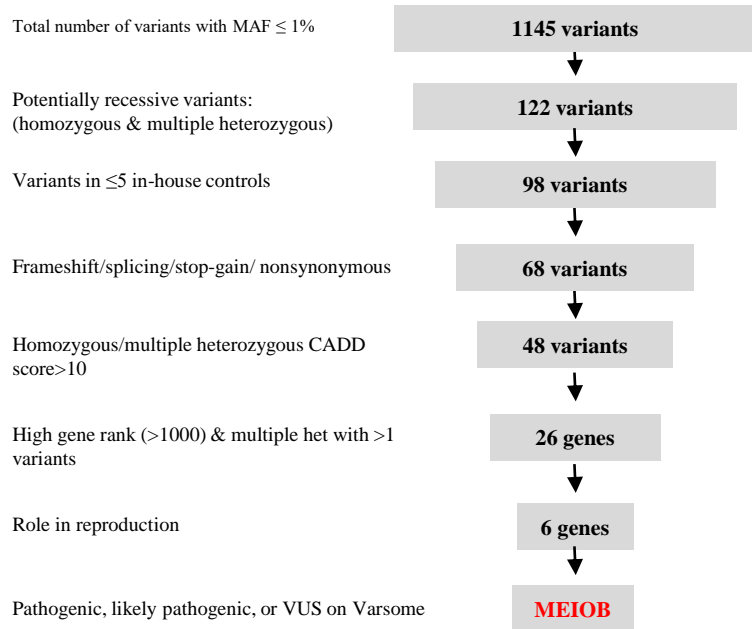

| Position       | Zygoty       | Variant | Gene    | CADD score | Classification | Full gene name                                              |
|----------------|--------------|---------|---------|------------|----------------|-------------------------------------------------------------|
| chr1:27224070  | multiple het | p.R200W | GPATCH3 | 27.3       | Likely Benign  | G patch domain containing 3                                 |
| chr1:27226830  | multiple het | p.Q35R  | GPATCH3 | 27.6       | Likely Benign  | G patch domain containing 3                                 |
| chr9:34489400  | hom          | p.D114G | DNAI1   | 22.8       | Likely Benign  | Dynein axonemal intermediate chain 1                        |
| chr9:35075528  | hom          | p.H456L | FANCG   | 24         | Likely Benign  | Fanconi anemia complementation group G                      |
| chr16:1894929  | hom          | p.R272X | MEIOB   | 37         | Pathogenic     | Meiosis specific with OB-fold                               |
| chr18:8784510  | hom          | p.T467M | MTCL1   | 23.9       | Likely Benign  | Microtubule crosslinking factor 1                           |
| chr19:45867799 | hom          | p.H177Y | ERCC2   | 10.02      | Benign         | ERCC excision repair 2, TFIIH core complex helicase subunit |

**Supplemental Figure 8. Exome filtering for recessive variants in patient 2136**



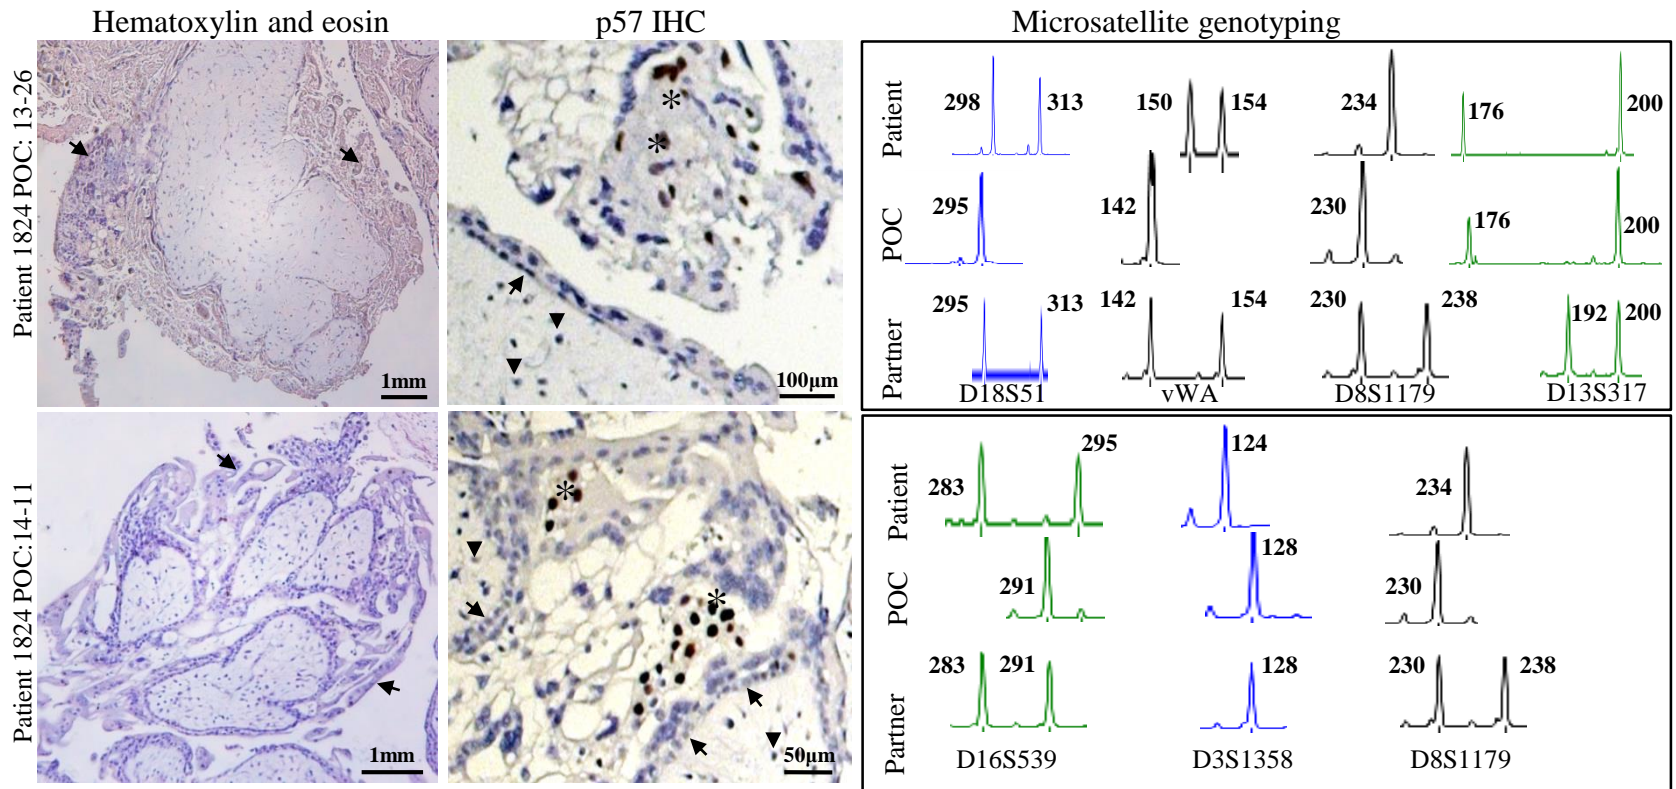

**Supplemental Figure 9.** Characterization of two HM tissues from patient 1824 with biallelic likely pathogenic variant in *MAJIN*. Left panel shows H&E staining demonstrating circumferential trophoblastic proliferation in the two products of conception (POCs) (arrows). Middle panel shows p57KIP2 IHC showing negative staining in the cytotrophoblast (arrows) in the two POCs of the patient while the internal control, the nuclei of the extravillous trophoblast cells are positive (asterisks) in the two POCs. Right panel shows the genotypes of the two CHM of patient 1824 demonstrating their androgenetic monospermic. In the two POCs, 3 microsatellite markers demonstrate the presence of only one paternal allele in the molar genome at each marker. Note the presence of the maternal chromosome 13 (allele 176bp) in POC 13-26.

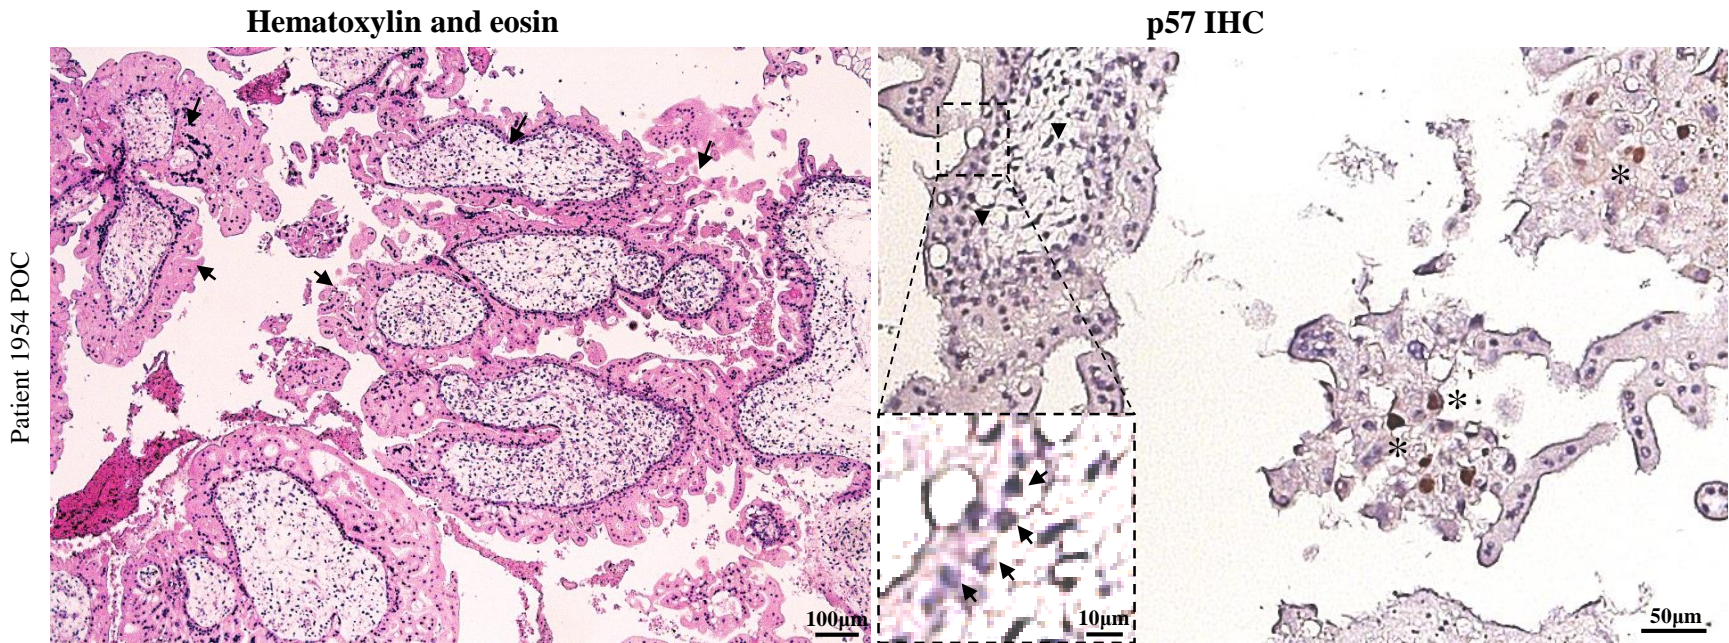

**Supplemental Figure 10.** Morphological evaluation of one HM from patient 1954 with a biallelic *SYCP2* pathogenic variant. Left panel shows H&E staining demonstrating trophoblastic proliferation in the product of conception (POC) (arrows). Right panel shows p57KIP2 IHC showing negative staining in the cytotrophoblast (arrows in the inset), while the internal control, the nuclei of the extravillous trophoblast cells are positive (asterisks).

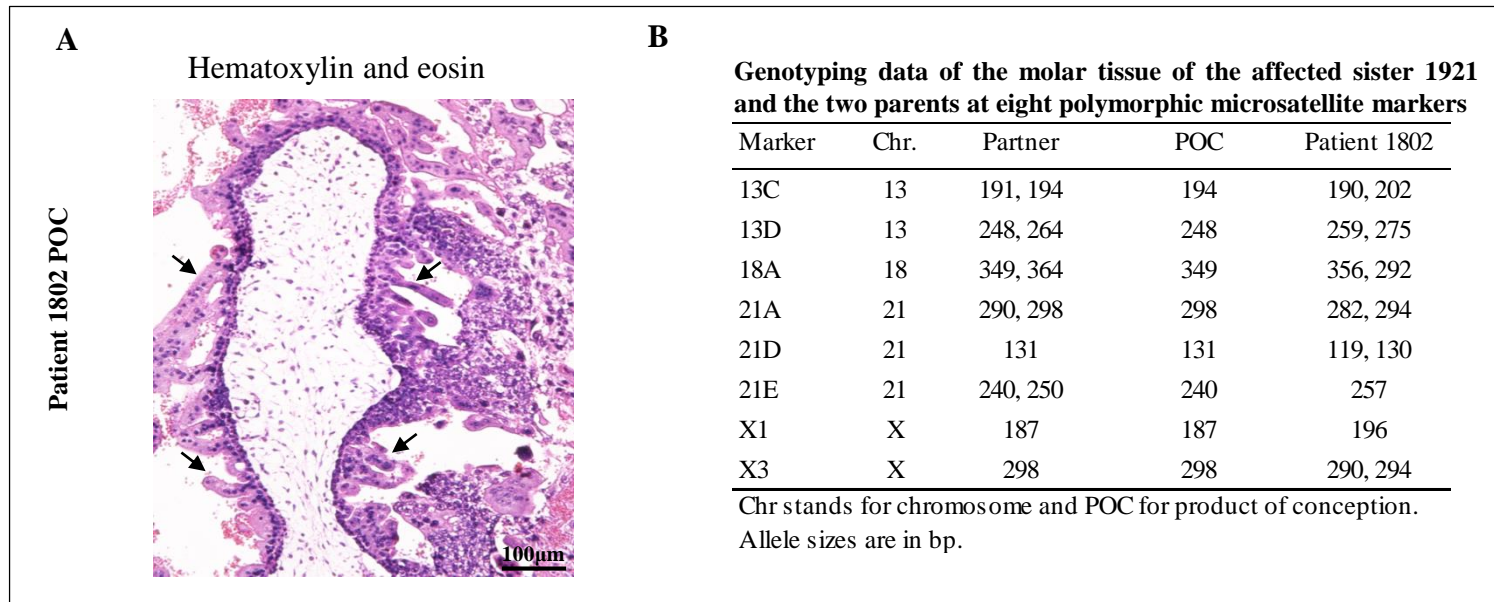

**Supplemental Figure 11.** Morphology of one HM from patient 1921 (the affected sister of patient 1802) with a bi-allelic pathogenic variant in *HFMI*. (A) The photo shows a chorionic villous with excessive circumferential trophoblastic proliferation (arrows) typical of HM. (B) Genotype data of the same product of conception (POC) shown in A, along with parental DNA, revealed one single paternal allele at each marker demonstrating the androgenetic monospermic genome of the mole. Under marker, the first two digits designate the chromosome number, example, 13C is a marker from chromosome 13, 13D is another marker from the same chromosome, and so on.

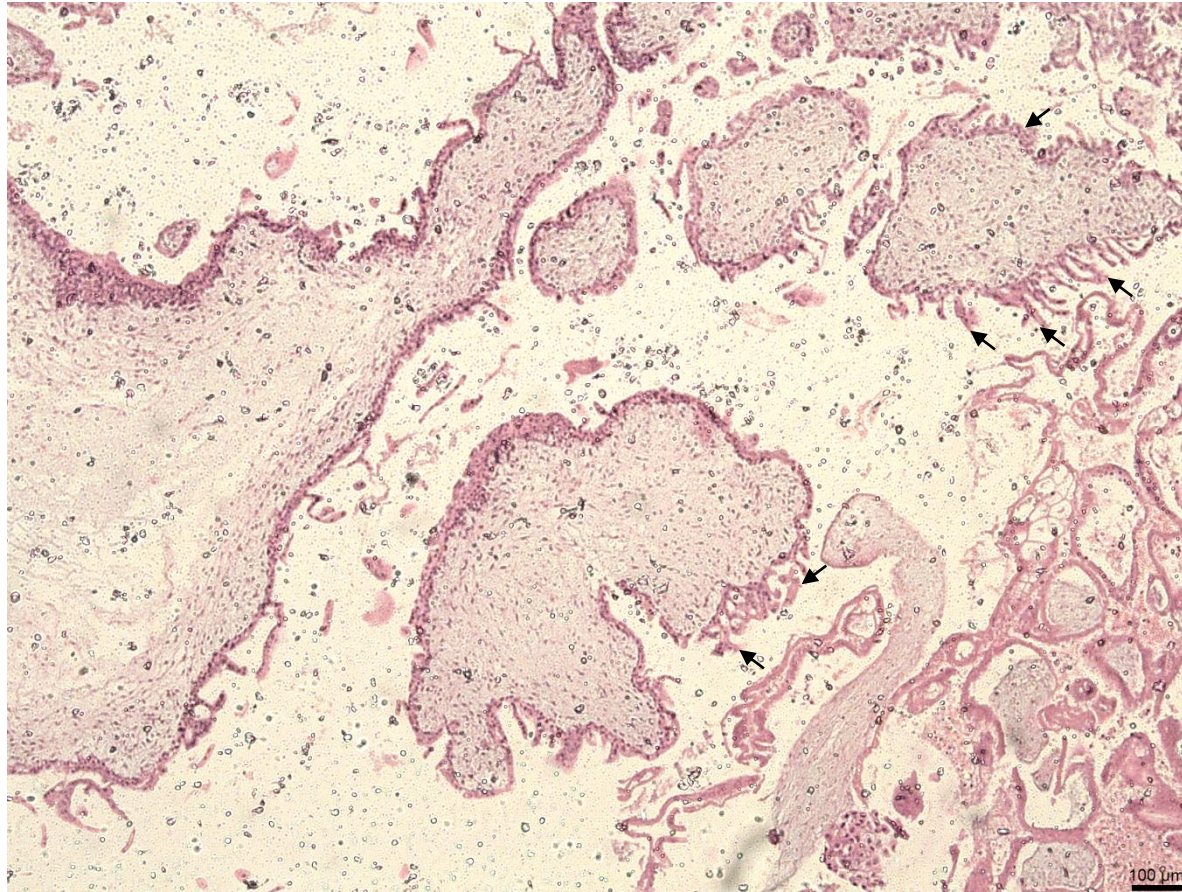

**Supplemental Figure 12.** Morphology of the HM from patient 2136 with a biallelic *MEIOB* pathogenic variant. H&E staining demonstrating excessive circumferential trophoblastic proliferation projections from the chorionic villi (arrows).

| Locus   | Alleles   |      |      |      |
|---------|-----------|------|------|------|
|         | 1690      | CHM3 | CHM4 | CHM5 |
| D8S1179 | 15        | 13   | 13   | 13   |
| D21S11  | 30 - 31.2 | 31.2 | 31.2 | 29   |
| D7S820  | 10 - 11   | 8    | 8    | 8    |
| CSF1PO  | 10 - 11   | 12   | 12   | 12   |
| D3S1358 | 14 - 17   | 14   | 15   | 15   |
| THO1    | 9 - 9.3   | 7    | 7    | 7    |
| D13S317 | 9 - 11    | 13   | 14   | 13   |
| D16S539 | 12 - 13   | 11   | 10   | 11   |
| D2S1338 | 18 - 20   | 18   | 18   | 18   |
| D19S433 | 12 - 15   | 16   | 15   | 15   |
| vWA     | 15 - 19   | 16   | 16   | 16   |
| TPOX    | 11 - 12   | 8    | 8    | 12   |
| D18S51  | 13 - 15   | 15   | 15   | 15   |
| AMEL    | X         | X    | X    | X    |
| D5S818  | 10 - 13   | 13   | 13   | 13   |
| FGA     | 23 - 25   | 22   | 22   | 25   |

**Supplemental Figure 13.** Multiplex genotype analysis of three CHM from patient 1690 with a biallelic predicted deleterious variant in *FOXL2*. Genotype data of the three molar conceptions, along with patient DNA, revealed single non-maternal alleles at several markers demonstrating the androgenetic monospermic genome of the mole

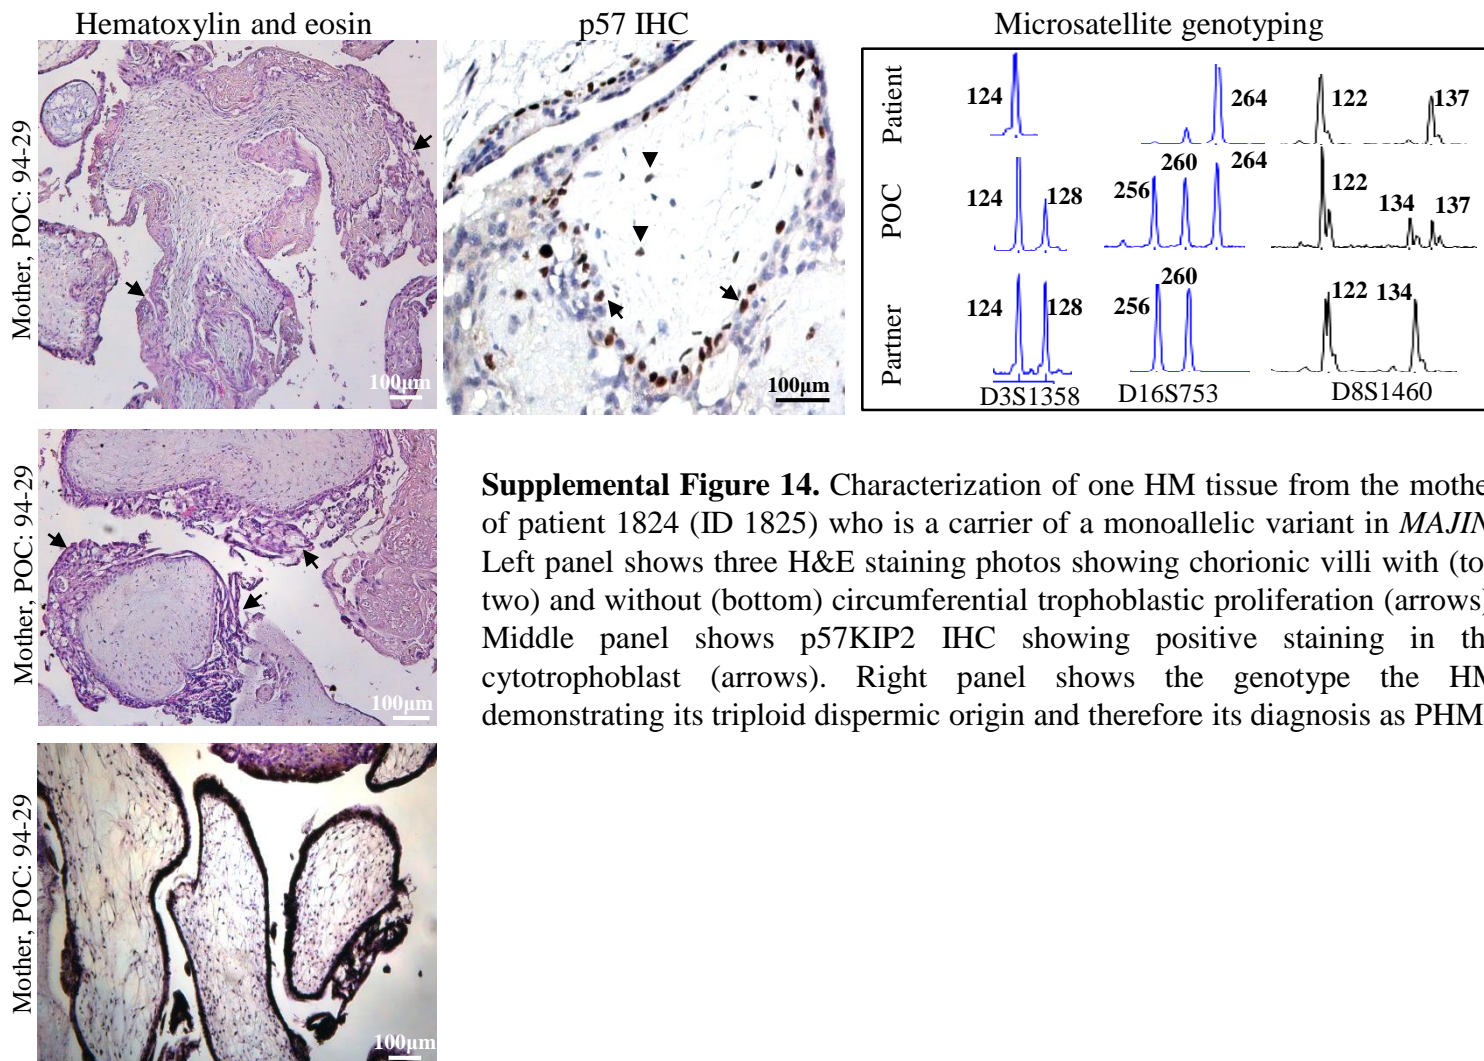

**Supplemental Figure 14.** Characterization of one HM tissue from the mother of patient 1824 (ID 1825) who is a carrier of a monoallelic variant in *MAJIN*. Left panel shows three H&E staining photos showing chorionic villi with (top two) and without (bottom) circumferential trophoblastic proliferation (arrows). Middle panel shows p57KIP2 IHC showing positive staining in the cytotrophoblast (arrows). Right panel shows the genotype the HM demonstrating its triploid dispermic origin and therefore its diagnosis as PHM.

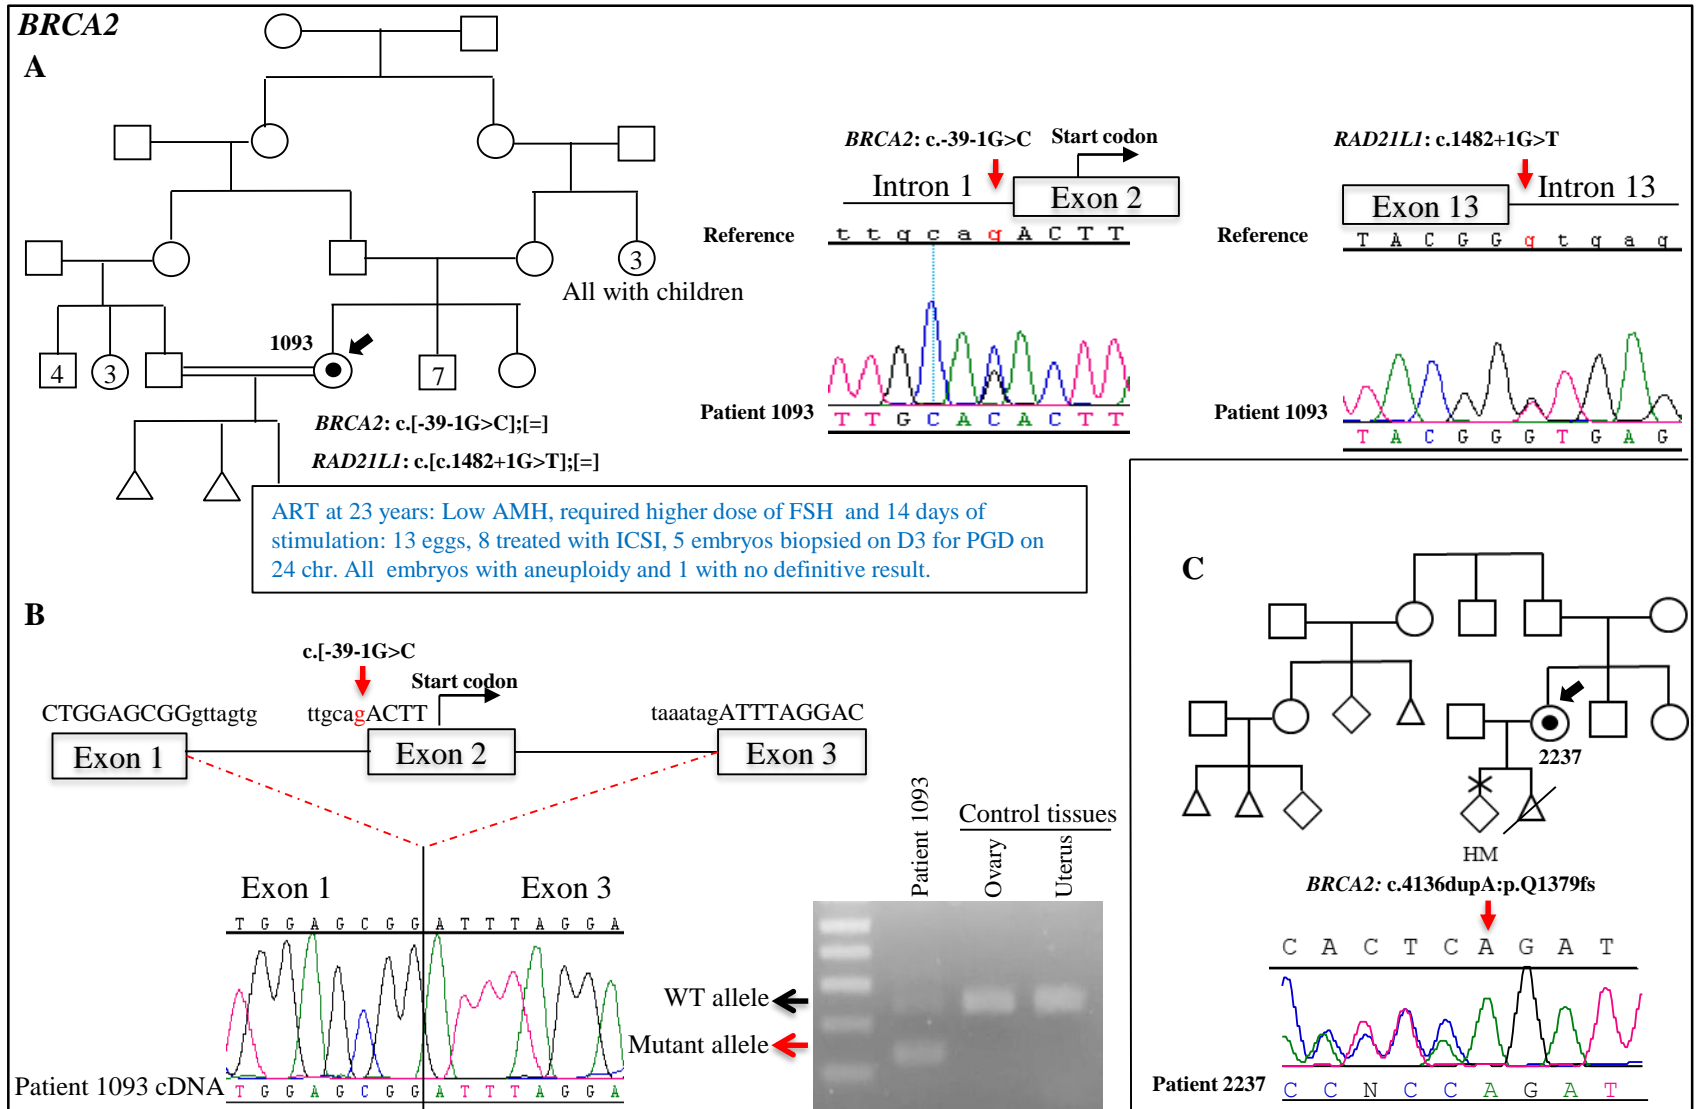

**Supplemental Figure 15.** A. Pedigree structure of the family of patient 1093 showing the chromatograms of her two variants in *BRCA2* and *RAD51L* along her reproductive history and additional medical information. B. cDNA analysis demonstrated the skipping of exon 2 containing the start codon from the transcripts. C. Pedigree structure of patient 2237 and the chromatogram showing her variant in *BRCA2*.

# BRCA2

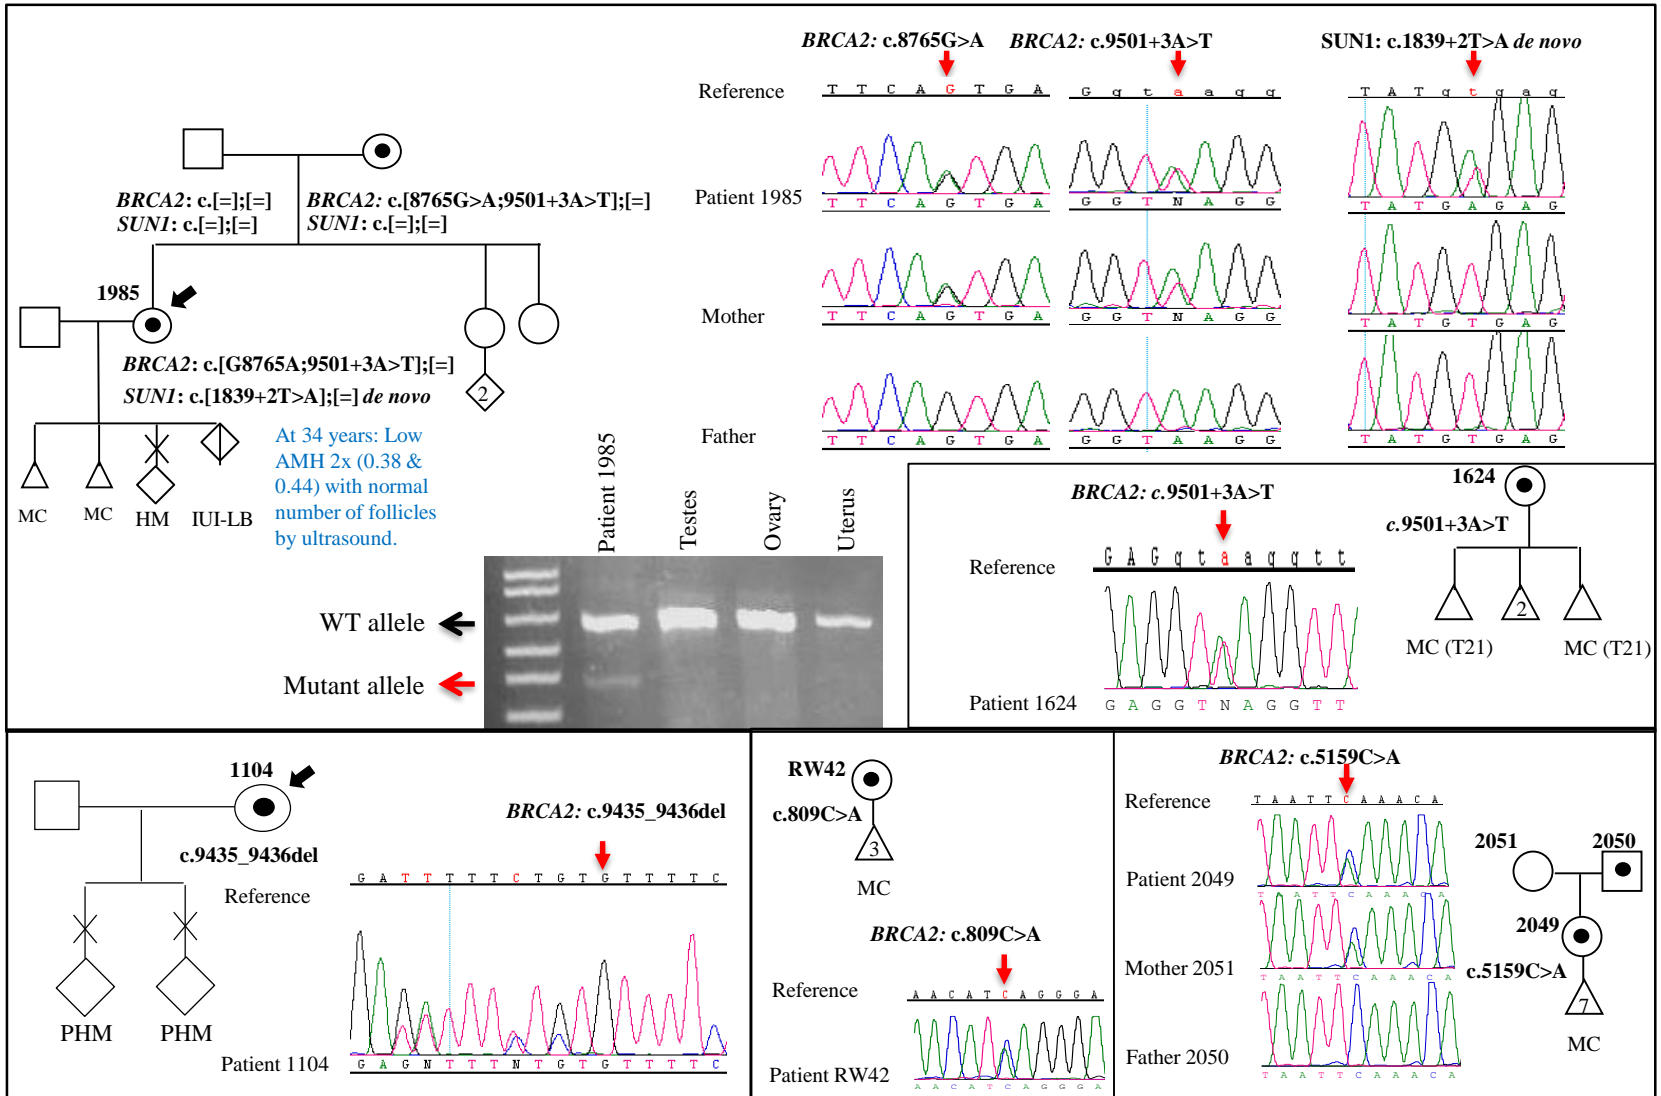

**Supplemental Figure 16.** Reproductive history and pedigree structure of the family of patient 1985 showing the segregation of her two variants in *BRCA2* (a missense and an extended splice site, c.9501+3A>T in cis) and the *de novo* occurrence of a variant in *SUN1* along with the chromatograms and additional medical information. The identity of the parents of the patient was confirmed using multiplex microsatellite genotyping. cDNA analysis of the splice variant in *BRCA2*, c.9501+3A>T, demonstrating the skipping of exon 25 in a fraction of transcripts from EBV lymphoblastoid cell line from the patient. Chromatograms of four other patients, 1624, 1104, RW42, and 2049, showing their variants and reproductive histories.



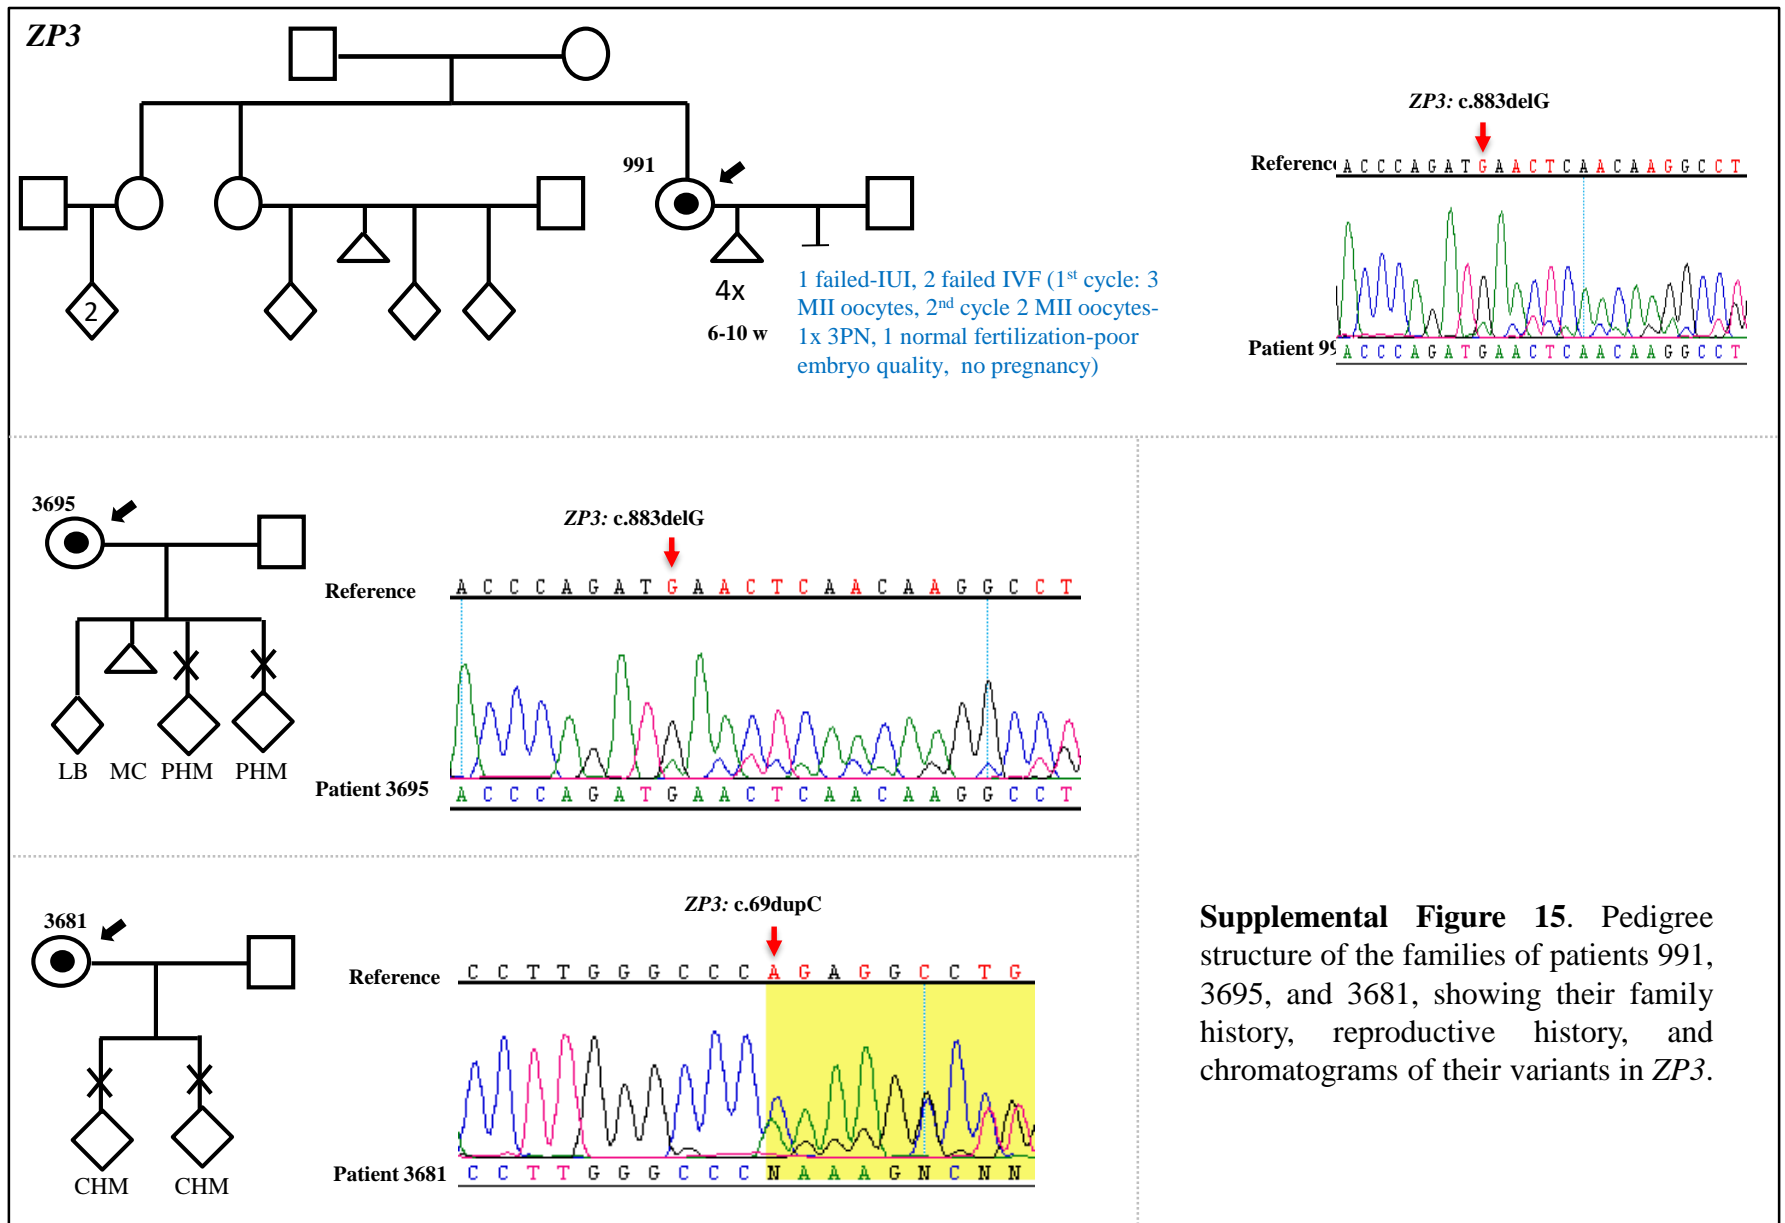

**Supplemental Figure 15.** Pedigree structure of the families of patients 991, 3695, and 3681, showing their family history, reproductive history, and chromatograms of their variants in ZP3.

**Supplemental Figure 17**

**Hematoxylin and eosin**

Patient 3681, 1<sup>st</sup> POC 05-73

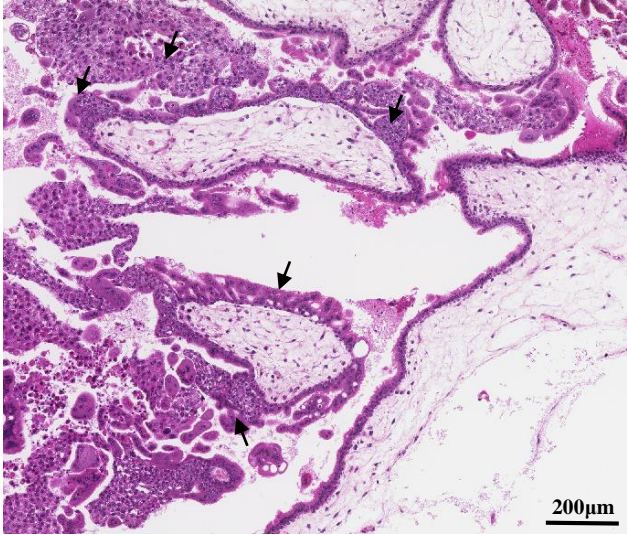

**p57 IHC**

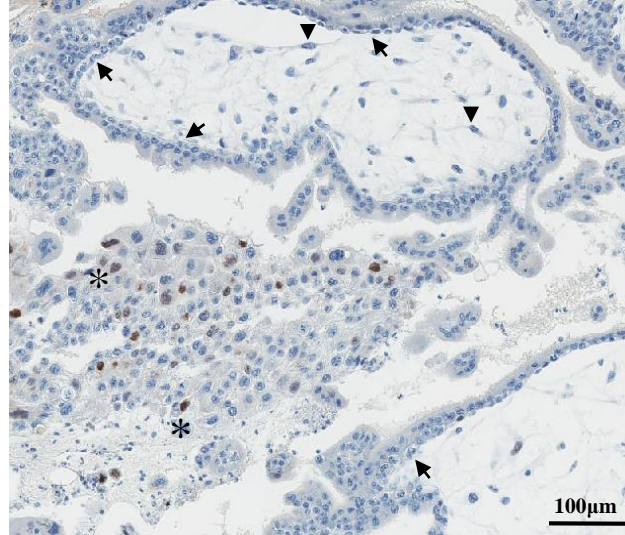

Not available

Patient 3681, 2<sup>nd</sup> POC: 08-99

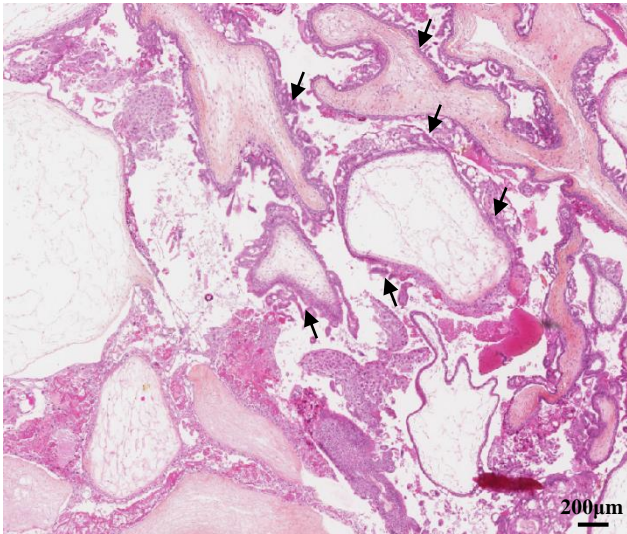

**Supplemental Figure 18.** Morphological evaluation of two HM from the patient with a monoallelic *ZP3* pathogenic variant. Left panel shows H&E staining demonstrating excessive circumferential trophoblastic proliferation in the two products of conception (POCs) (arrows) and their diagnosis as CHM. Right panel shows p57KIP2 IHC on one CHM showing negative staining in the cytotrophoblast (arrows), while the internal control, the nuclei of the extravillous trophoblast cells are positive (asterisks). P57 IHC corroborates the morphological diagnosis of CHM.

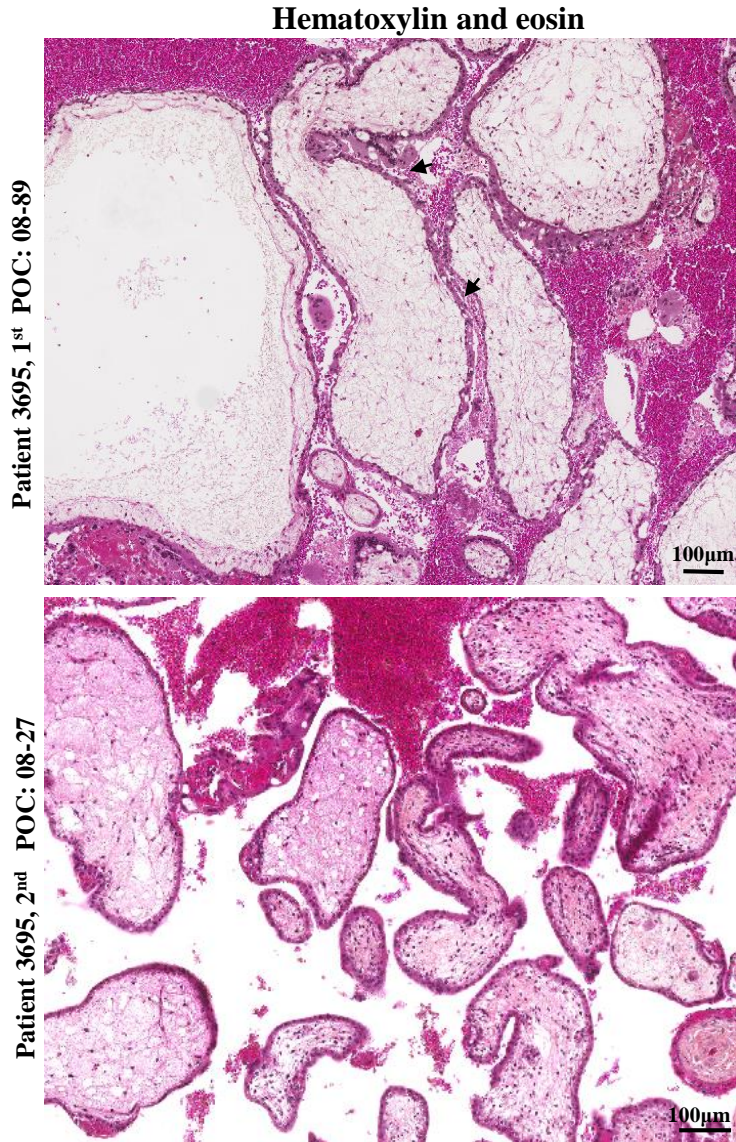

**Flow Cytometry**

3n

Not available

**p57 IHC**

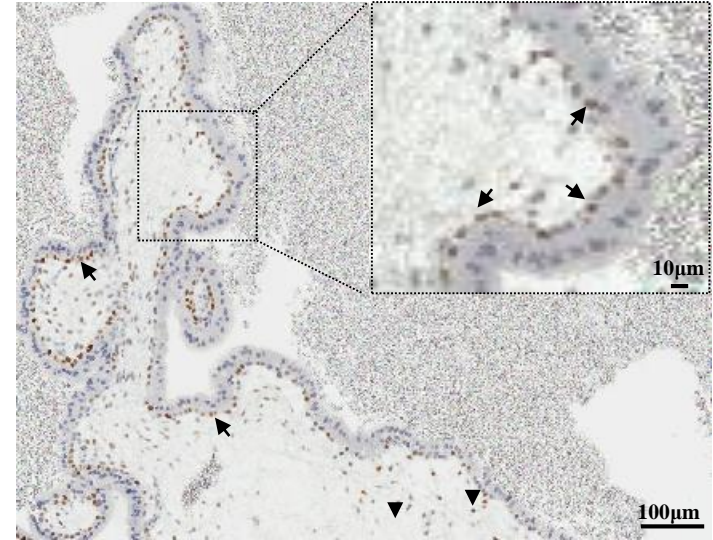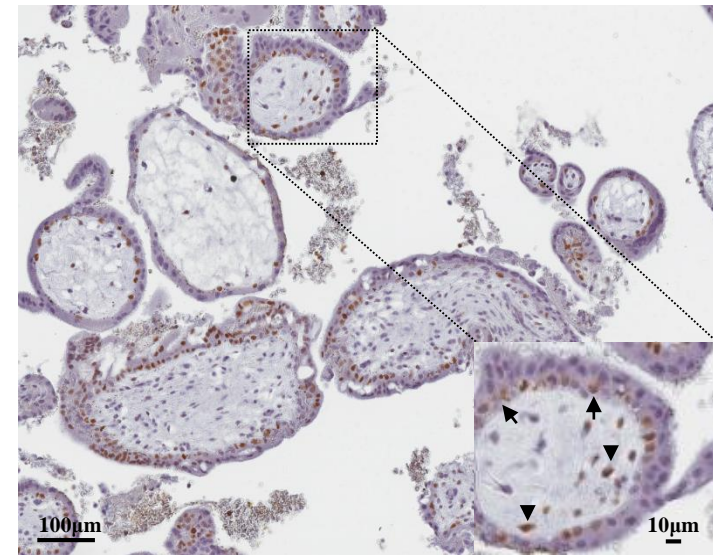

**Supplemental Figure 19.** Morphological evaluation of two HMs from patient 3695 with a monoallelic *ZP3* VUS P variant. Left panel shows H&E staining demonstrating trophoblastic proliferation in the products of conception (POCs) (arrows). Middle panel shows flow cytometry data on one POC. Right panel shows p57KIP2 IHC showing positive staining in the cytotrophoblast (arrows), and in the internal control (asterisks) in the nuclei of the extravillous trophoblast cells.

### Proteins with roles in ovarian/meiotic functions screened

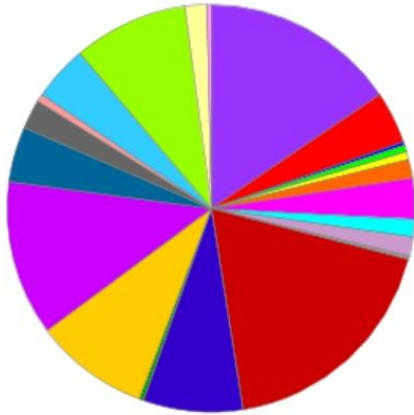

- DNA metabolism protein (PC00009)
- RNA metabolism protein (PC00031)
- calcium-binding protein (PC00060)
- cell adhesion molecule (PC00069)
- cell junction protein (PC00070)
- chaperone (PC00072)
- chromatin/chromatin-binding, or -regulatory protein (PC00077)
- cytoskeletal protein (PC00085)
- defense/immunity protein (PC00090)
- extracellular matrix protein (PC00102)
- gene-specific transcriptional regulator (PC00264)
- intercellular signal molecule (PC00207)
- membrane traffic protein (PC00150)
- metabolite interconversion enzyme (PC00262)
- protein modifying enzyme (PC00260)
- protein-binding activity modulator (PC00095)
- scaffold/adaptor protein (PC00226)
- transfer/carrier protein (PC00219)
- translational protein (PC00263)
- transmembrane signal receptor (PC00197)
- transporter (PC00227)
- viral or transposable element protein (PC00237)

### Proteins with validated variants in our patients

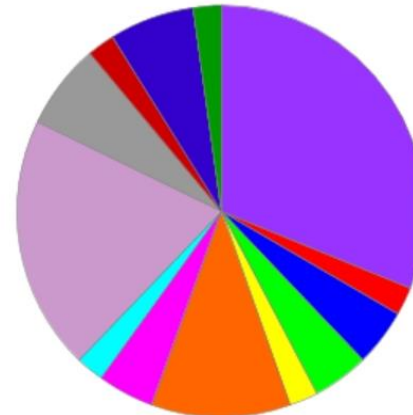

- DNA metabolism protein (PC00009)
- RNA metabolism protein (PC00031)
- chromatin/chromatin-binding, or -regulatory protein (PC00077)
- cytoskeletal protein (PC00085)
- defense/immunity protein (PC00090)
- gene-specific transcriptional regulator (PC00264)
- intercellular signal molecule (PC00207)
- metabolite interconversion enzyme (PC00262)
- protein modifying enzyme (PC00260)
- protein-binding activity modulator (PC00095)
- structural protein (PC00211)
- transmembrane signal receptor (PC00197)
- transporter (PC00227)

**Supplemental Figure 20.** Panther classification of the 482 genes screened in our patients and those with monoallelic P/LP variants validated in our patients showing all pathways. These same pies are provided in Figure 4 in the manuscript.

| Panther classified ovarian/meiotic genes (n=482) screened for protein truncating variants in our patients | Percentage of genes in class | Panther classification of ovarian/meiotic genes (n=54) whose variants were confirmed by Sanger sequencing in our patients | Percentage of genes in class |
|-----------------------------------------------------------------------------------------------------------|------------------------------|---------------------------------------------------------------------------------------------------------------------------|------------------------------|
| Gene-specific transcriptional regulator (PC00264)Intercellular signal molecule (PC00207)                  | 13.1                         | DNA metabolism protein (PC00009)                                                                                          | 24.6                         |
| DNA metabolism protein (PC00009)                                                                          | 11                           | Protein modifying enzyme (PC00260)                                                                                        | 15.8                         |
| Protein modifying enzyme (PC00260)                                                                        | 8.7                          | Gene-specific transcriptional regulator (PC00264)Intercellular signal molecule (PC00207)                                  | 8.8                          |
| Metabolite Interconversion enzyme (PC00262)                                                               | 6.4                          | Protein-binding activity modulator (PC00095)                                                                              | 5.3                          |
| Transmembrane signal receptor                                                                             | 6.4                          | Transmembrane signal receptor                                                                                             | 5.3                          |
| Intercellular signal molecule (PC00207)                                                                   | 5.6                          | Chromatin/chromatin-binding or regulatory protein (PC00077)                                                               | 3.5                          |
| Protein-binding activity modulator (PC00095)                                                              | 3.1                          | Cytoskeletal protein (PC00085)                                                                                            | 3.5                          |
| Translational protein (PC00263)Transmembrane signal receptor (PC00197)                                    | 3.1                          | Intercellular signal molecule (PC00207)                                                                                   | 3.5                          |
| RNA metabolism protein (PC00031)                                                                          | 2.9                          | RNA metabolism protein (PC00031)                                                                                          | 1.8                          |
| Chromatin/chromatin-binding or regulatory protein (PC00077)                                               | 2.3                          | Defense/immunity protein (PC00090)                                                                                        | 1.8                          |
| Scaffold/adaptor protein (PC00226)                                                                        | 1.7                          | Metabolite Interconversion enzyme (PC00262)                                                                               | 1.8                          |
| Transporter (PC00227)                                                                                     | 1.2                          | Structural protein (PC00211)                                                                                              | 1.8                          |
| Chaperon (PC00072)                                                                                        | 1                            |                                                                                                                           |                              |
| Cytoskeletal protein (PC00085)                                                                            | 1                            |                                                                                                                           |                              |
| Defense/immunity protein (PC00090)                                                                        | 1                            |                                                                                                                           |                              |
| Cell adhesion molecule (PC00069)                                                                          | 0.4                          |                                                                                                                           |                              |
| Cell junction protein (PC00070)                                                                           | 0.4                          |                                                                                                                           |                              |
| Transfer/carrier protein (PC00219)                                                                        | 0.4                          |                                                                                                                           |                              |
| Calcium-binding protein (PC00060)                                                                         | 0.2                          |                                                                                                                           |                              |
| Extracellular matrix protein (PC00102)                                                                    | 0.2                          |                                                                                                                           |                              |
| Membrane traffic protein (PC00150)                                                                        | 0.2                          |                                                                                                                           |                              |
| Viral or transposable element protein (PC00237)                                                           | 0.2                          |                                                                                                                           |                              |
| Structural protein (PC00211)                                                                              | 0                            |                                                                                                                           |                              |

**Supplemental Figure 21.** Panther Pathway classification of the 482 genes screened in our patients and the number of genes in each class (left) and those with monoallelic P/LP variants validated in our patients (right) along with the statistics. Statistics were performed using the Peason’s Chi or Fisher tests as appropriate. P value <0.05 was considered significant.

| Panther protein class                                       | Panther classified ovarian/meiotic genes (n=482) screened for protein truncating variants in our patients |                     |                               | Panther classification of ovarian/meiotic genes (n=57) whose variants were confirmed by Sanger sequencing in our patients |                     |                               | Statistical significance             |
|-------------------------------------------------------------|-----------------------------------------------------------------------------------------------------------|---------------------|-------------------------------|---------------------------------------------------------------------------------------------------------------------------|---------------------|-------------------------------|--------------------------------------|
|                                                             | Percentage of genes in class                                                                              | N. of gene in class | N. of genes not in this class | Percentage of genes in class                                                                                              | N. of gene in class | N. of genes not in this class | Chi square by Pearson/Fisher test as |
| Gene-specific transcriptional regulator (PC002              | 13.1                                                                                                      | 63                  | 419                           | 8.8                                                                                                                       | 5                   | 52                            | ns                                   |
| DNA metabolism protein (PC00009)                            | 11                                                                                                        | 53                  | 429                           | 24.6                                                                                                                      | 14                  | 43                            | p=0.0033                             |
| Protein modifying enzyme (PC00260)                          | 8.7                                                                                                       | 42                  | 440                           | 15.8                                                                                                                      | 9                   | 48                            | ns                                   |
| Metabolite Interconversion enzyme (PC00262                  | 6.4                                                                                                       | 31                  | 451                           | 1.8                                                                                                                       | 1                   | 56                            | ns                                   |
| Transmembrane signal receptor (PC00197)                     | 6.4                                                                                                       | 31                  | 451                           | 5.3                                                                                                                       | 3                   | 54                            | ns                                   |
| Intercellular signal molecule (PC00207)                     | 5.6                                                                                                       | 27                  | 455                           | 3.5                                                                                                                       | 2                   | 55                            | ns                                   |
| Protein-binding activity modulator (PC00095)                | 3.1                                                                                                       | 15                  | 467                           | 5.3                                                                                                                       | 3                   | 54                            | ns                                   |
| Translational protein (PC00263)                             | 3.1                                                                                                       | 15                  | 467                           |                                                                                                                           |                     |                               |                                      |
| RNA metabolism protein (PC00031)                            | 2.9                                                                                                       | 14                  | 468                           | 1.8                                                                                                                       | 1                   | 56                            | ns                                   |
| Chromatin/chromatin-binding or regulatory protein (PC00077) | 2.3                                                                                                       | 11                  | 471                           | 3.5                                                                                                                       | 2                   | 55                            | ns                                   |
| Scaffold/adaptor protein (PC00226)                          | 1.7                                                                                                       | 8                   | 474                           |                                                                                                                           |                     |                               |                                      |
| Transporter (PC00227)                                       | 1.2                                                                                                       | 6                   | 476                           | 1.8                                                                                                                       | 1                   | 56                            | ns                                   |
| Chaperon (PC00072)                                          | 1                                                                                                         | 5                   | 477                           |                                                                                                                           |                     |                               |                                      |
| Cytoskeletal protein (PC00085)                              | 1                                                                                                         | 5                   | 477                           | 3.5                                                                                                                       | 2                   | 55                            | ns                                   |
| Defense/immunity protein (PC00090)                          | 1                                                                                                         | 5                   | 477                           | 1.8                                                                                                                       | 1                   | 56                            | ns                                   |
| Cell adhesion molecule (PC00069)                            | 0.4                                                                                                       | 2                   | 480                           |                                                                                                                           |                     |                               |                                      |
| Cell junction protein (PC00070)                             | 0.4                                                                                                       | 2                   | 480                           |                                                                                                                           |                     |                               |                                      |
| Transfer/carrier protein (PC00219)                          | 0.4                                                                                                       | 2                   | 480                           |                                                                                                                           |                     |                               |                                      |
| Calcium-binding protein (PC00060)                           | 0.2                                                                                                       | 1                   | 481                           |                                                                                                                           |                     |                               |                                      |
| Extracellular matrix protein (PC00102)                      | 0.2                                                                                                       | 1                   | 481                           |                                                                                                                           |                     |                               |                                      |
| Membrane traffic protein (PC00150)                          | 0.2                                                                                                       | 1                   | 481                           |                                                                                                                           |                     |                               |                                      |
| Viral or transposable element protein (PC002                | 0.2                                                                                                       | 1                   | 481                           |                                                                                                                           |                     |                               |                                      |
| Structural protein (PC00211)                                | 0                                                                                                         | 0                   | 482                           | 1.8                                                                                                                       | 1                   | 56                            |                                      |

**Supplemental Figure 22.** Percentages of the different pathways of the 494 screened genes and those that have P/LP variants validated in our patients.

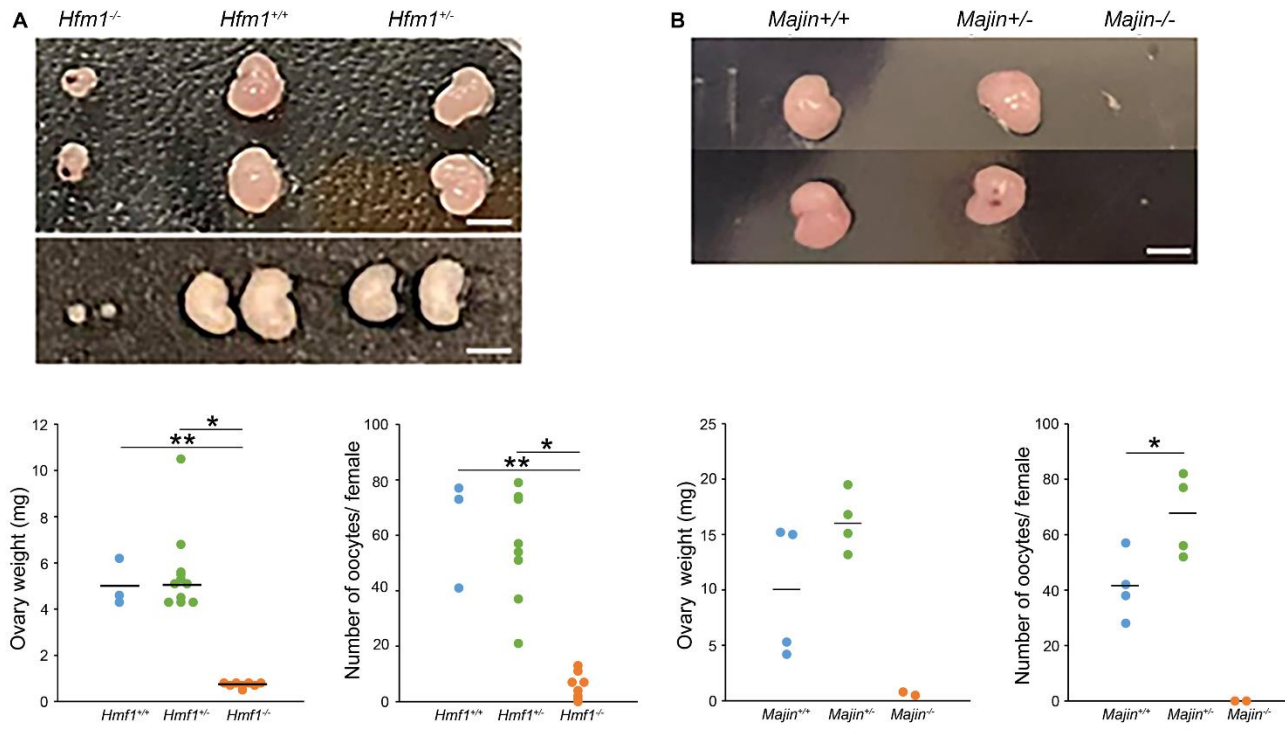

**Supplemental Figure 23.** A. Gross morphological of ovaries from *Hfm1*<sup>-/-</sup>, *Hfm1*<sup>+/-</sup>, and *Hfm1*<sup>+/+</sup> at 21-24 dpp showing the significantly small ovarian sizes of *Hfm1*<sup>-/-</sup>. Lower panel shows ovarian weight and number of collected oocytes after superovulation. B. Gross morphological of ovaries from *Majin*<sup>+/+</sup>, *Majin*<sup>+/-</sup>, and *Majin*<sup>-/-</sup> at 21-24 dpp showing the complete loss of the ovaries in *Majin*<sup>-/-</sup>. Bar 2mm. Lower panel shows ovarian weight and number of collected oocytes after superovulation. \*P<0.05 and \*\* P< 0.001. Statistics were determined using one-way ANOVA or Student’s t-test.

| <b>Supplemental Table 3. Statistical analysis of alleles frequencies in patients and gnomAD v4.1.0</b>                                                                    |                         |                             |                   |
|---------------------------------------------------------------------------------------------------------------------------------------------------------------------------|-------------------------|-----------------------------|-------------------|
| <b>BRCA2</b>                                                                                                                                                              |                         |                             |                   |
|                                                                                                                                                                           | Number of P/LP variants | Number of wild-type alleles | Fisher exact test |
| Our patients (n=311)                                                                                                                                                      | 5                       | 617                         |                   |
| gnomAD (v4.1.0)                                                                                                                                                           | 1213                    | 1014643                     |                   |
| <b>p value</b>                                                                                                                                                            |                         |                             | <b>0.00101792</b> |
|                                                                                                                                                                           |                         |                             |                   |
| <b>ZP3</b>                                                                                                                                                                |                         |                             |                   |
|                                                                                                                                                                           | Number of P/LP variants | Number of wild-type alleles | Fisher exact test |
| Our patients (n=311)                                                                                                                                                      | 3                       | 619                         |                   |
| gnomAD (v4.1.0)                                                                                                                                                           | 301                     | 993960                      |                   |
| <b>p value</b>                                                                                                                                                            |                         |                             | <b>0.00098039</b> |
| The two tailed Fisher exact test was performed using the following webiste, <a href="https://www.medcalc.org/calc/fisher.php">https://www.medcalc.org/calc/fisher.php</a> |                         |                             |                   |
|                                                                                                                                                                           |                         |                             |                   |
|                                                                                                                                                                           |                         |                             |                   |



Supplemental Table 4. Primary and secondary antibodies used.

To identify meiotic substages

|                             | Host   | Source                 | Catalog No. | Concentration |
|-----------------------------|--------|------------------------|-------------|---------------|
| <b>Primary antibodies</b>   |        |                        |             |               |
| TRA98                       | rat    | AbCam                  | ac82527     | 1: 1000       |
| SYCP3                       | rabbit | Abcam                  | ac15093     | 1: 500        |
| CREST                       | human  | Immunovision           | HCT-0100    | 1: 2000       |
| $\gamma$ H2AX               | mouse  | Millipore              | 05-636      | 1: 1000       |
| <b>Secondary antibodies</b> |        |                        |             |               |
| rat IgG-FITC                | goat   | Jackson ImmunoResearch | 112-545-167 | 1: 1000       |
| rabbit IgG-rhodamin         | goat   | PIERCE                 | 31670       | 1: 1000       |
| human IgG-rho               | goat   | PIERCE                 | 31656       | 1: 1000       |
| mouse IgG-AF647             | goat   | Invitrogen             | A-21236     | 1: 1000       |

To visualize MLH1 foci

|                               | Host   | Source                 | Catalog No. | Concentration |
|-------------------------------|--------|------------------------|-------------|---------------|
| <b>Primary antibodies</b>     |        |                        |             |               |
| SYCP3                         | rabbit | Abcam                  | ac15093     | 1: 500        |
| CREST                         | human  | Immunovision           | HCT-0100    | 1:1000        |
| MLH1                          | mouse  | BD Pharmigen           | 550838      | 1: 50         |
| <b>Secondary antibodies</b>   |        |                        |             |               |
| rabbit IgG-biotin             | goat   | Invitrogen             | 31823       | 1:1000        |
| human IgG-DTAF                | goat   | PIERCE                 | 31528       | 1:1000        |
| mouse IgG-FITC                | goat   | Jackson ImmunoResearch | 115-095-003 | 1:1000        |
|                               |        |                        |             |               |
| <b>Streptavidin-rhodamine</b> |        | Invitrogen             | S6366       | 1: 1000       |

To identify oocytes and follicles

|                             | Host   | Source                 | Catalog No. | Concentration |
|-----------------------------|--------|------------------------|-------------|---------------|
| <b>Primary antibodies</b>   |        |                        |             |               |
| FOXL2                       | goat   | Novus                  | NB100-1277  | 1:1000        |
| MSY2                        | rabbit | AbCam                  | ab3164      | 1: 500        |
| <b>Secondary antibodies</b> |        |                        |             |               |
| goat IgG-RRX                | donkey | Jackson ImmunoResearch | 705-295-003 | 1:1000        |
| rabbit IgG-AF488            | donkey | Invitrogen             | A21206      | 1:1000        |

To examine oocytes after in vitro maturation

|                         | Host  | Source     | Catalog No. | Concentration |
|-------------------------|-------|------------|-------------|---------------|
| $\alpha$ -tubulin-AF488 | mouse | Invitrogen | #53-4502-82 | 1: 500        |
